# Supplementary material for: Exploring the expression and preliminary function of chicken Gimap5 gene
Source: PeerJ. 2019 Sep 26;7:e7618. doi: 10.7717/peerj.7618 (PMC6766365; doi:10.7717/peerj.7618)
Supplement: Dataset S1 [file peerj-07-7618-s001.xlsx]

## Sheet: Sheet1
	GIMAP5	GIMAP5	GIMAP5	ACTIN	ACTIN	ACTIN
Heart	27.9853	28.1249	28.0551	19.9493	19.279	19.6142
Liver	24.1253	24.2619	24.1936	17.6623	18.4351	18.0487
Spleen	25.1097	25.2055	25.1576	16.0279	16.5358	16.2818
Lung	25.5441	25.7233	25.6337	17.8647	17.9512	17.9079
Kidney	30.9646	29.3821	30.1733	18.2829	18.4233	18.3531
Brain	29.8272	29.9983	29.9128	18.7211	18.8503	18.7857
Skeletal muscle	31.0259	31.4743	31.2501	18.3036	18.3745	18.339
Gizzard	29.9494	30.1845	30.067	15.3095	15.6713	15.4904
Thymus	26.1201	26.0588	26.0894	18.2815	18.0067	18.1441
Skin	29.4178	29.3577	29.3877	18.5353	20.1314	19.3334
Small intestine	24.7112	24.8059	24.7585	16.9872	17.0186	17.0029
Large intestine	24.6744	24.7432	24.7088	17.1503	17.4584	17.3044
Proventriculus	27.1933	27.3145	27.2539	17.8506	17.8465	17.8486
Fat	27.8181	27.7586	27.7883	20.0014	19.8285	19.915
Blood	27.6716	27.2587	27.4651	20.8691	20.8893	20.8792
Bursa	25.2271	25.3176	25.2724	16.0788	16.1214	16.1001
