# Supplementary material for: Exploring the expression and preliminary function of chicken Gimap5 gene
Source: PeerJ. 2019 Sep 26;7:e7618. doi: 10.7717/peerj.7618 (PMC6766365; doi:10.7717/peerj.7618)
Supplement: Dataset S3 [file peerj-07-7618-s003.xlsx]

## Sheet: Sheet1
	GIMAP5	GIMAP5	GIMAP5	ACTIN	ACTIN	ACTIN
Heart	26.2463	26.2783	26.2623	20.7115	20.615	20.6633
Liver	27.2945	27.2917	27.2931	20.3715	21.1742	20.7729
Spleen	22.4134	22.5855	22.4994	15.6593	16.0633	15.8613
Lung	25.2936	25.3104	25.302	19.9286	19.9181	19.9234
Kidney	30.6955	28.1106	29.403	20.1044	20.0935	20.0989
Brain	26.1399	26.2303	26.1851	17.5955	17.5884	17.592
Skeletal muscle	28.3942	29.7493	29.0718	19.6525	19.8815	19.767
Gizzard	28.61	28.7867	28.6984	17.0793	16.8896	16.9844
Thymus	24.9396	24.8521	24.8958	18.1095	18.1855	18.1475
Skin	28.1862	28.4062	28.2962	20.0733	20.3018	20.1876
Small intestine	20.7708	20.8261	20.7984	15.1626	15.1149	15.1387
Large intestine	21.8568	21.9535	21.9052	16.1743	16.3192	16.2467
Proventriculus	26.8648	26.9731	26.919	19.9619	19.9903	19.9761
Fat	29.7444	29.4561	29.6002	20.9757	20.6988	20.8372
