# Supplementary material for: Exploring the expression and preliminary function of chicken Gimap5 gene
Source: PeerJ. 2019 Sep 26;7:e7618. doi: 10.7717/peerj.7618 (PMC6766365; doi:10.7717/peerj.7618)
Supplement: Dataset S4 [file peerj-07-7618-s004.xlsx]

## Sheet: Sheet1
	GIMAP5	GIMAP5	GIMAP5	ACTIN	ACTIN	ACTIN
Control-Blood	24.7832	24.8182	24.8007	21.813	21.777	21.795
Control-Liver	21.8767	21.942	21.9094	18.5104	18.9686	18.7395
Control-Spleen	23.6201	23.6156	23.6178	17.5827	17.9923	17.7875
Control-Bursa	23.3575	23.227	23.2922	17.5627	17.6291	17.5959
Control-Thymus	24.2506	24.0883	24.3694	18.2857	18.3377	18.3117
ND-Blood	25.2643	25.3931	25.3287	22.547	22.0688	22.3079
ND-Liver	26.7289	26.6326	26.6807	20.9702	21.0123	20.9913
ND-Spleen	25.986	26.3129	26.1494	19.4685	19.6989	19.5837
ND-Bursa	23.7213	23.8067	23.764	17.021	17.0193	17.0201
ND-Thymus	24.3856	24.5715	24.4785	19.4508	19.5104	19.4806
